# Supplementary material for: A Ratiometric Biosensor Containing Manganese Dioxide Nanosheets and Nitrogen-Doped Quantum Dots for 2,4-Dichlorophenoxyacetic Acid Monitoring
Source: MDPI journal article supplement (doi:10.3390/bios14020063), 2024-01-24
Supplement: s1 [file s1]

## Electronic Supporting Material (ESM)

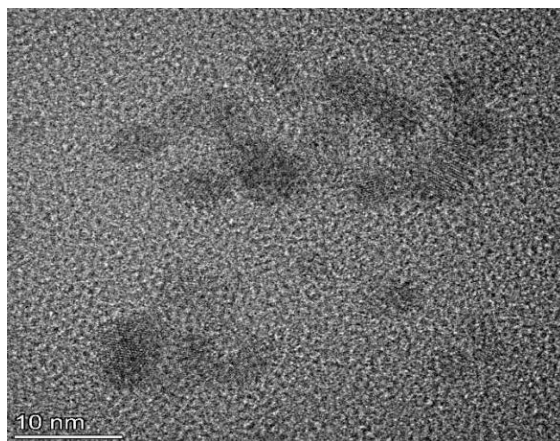

**Figure. S1** (A) TEM image,

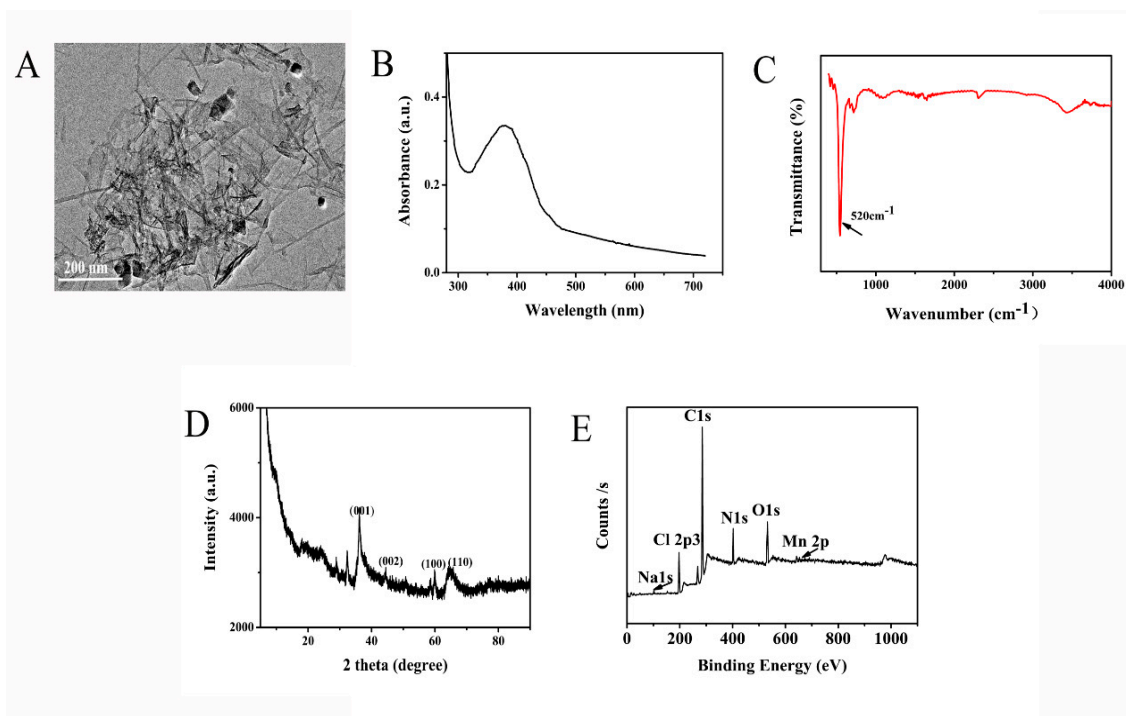

**Figure.S2** (A) TEM image of manganese dioxide nanosheets (MnO<sub>2</sub>), (B) UV-Vis absorption spectrum of MnO<sub>2</sub>, (C) FT-IR spectrum of MnO<sub>2</sub>, (D) XRD pattern of MnO<sub>2</sub> and (E) XPS survey spectrum of MnO<sub>2</sub>.

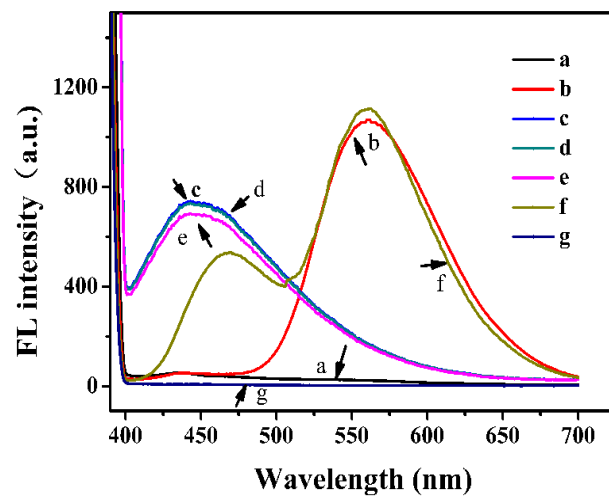

**Figure.S3** Fluorescence spectra of various substances (a)  $\text{MnO}_2$ , (b) OPD, (c)  $\text{MnO}_2$ +OPD, (d) NCDs, (e)  $\text{MnO}_2$ +NCDs, (f)  $\text{MnO}_2$ +OPD+NCDs

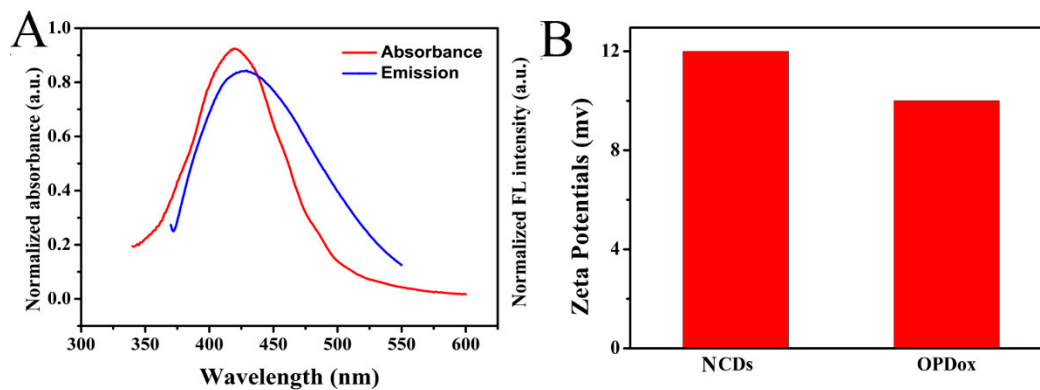

**Figure.S4** (A) UV-vis absorption spectrum of OPDox and fluorescence emission spectrum of NCDs (EX=360nm), (B) the potential diagram of OPDox and NCDs

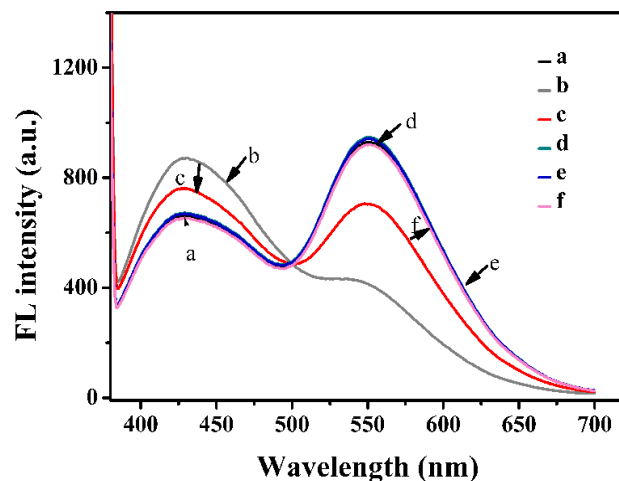

**Figure.S5** Fluorescence spectra of ratio fluorescence system before and after adding ALP and 2, 4-D, before: (a)  $\text{MnO}_2$ +OPD+NCDs, after: (b)  $\text{MnO}_2$ +OPD+NCDs+ALP+AAP, (c)  $\text{MnO}_2$ +OPD+NCDs+ALP+AAP+2,4-D, (d)  $\text{MnO}_2$ +OPD+NCDs+2,4-D, (e)  $\text{MnO}_2$ +OPD+NCDs+AAP, (f)  $\text{MnO}_2$ +OPD+NCDs+ALP.

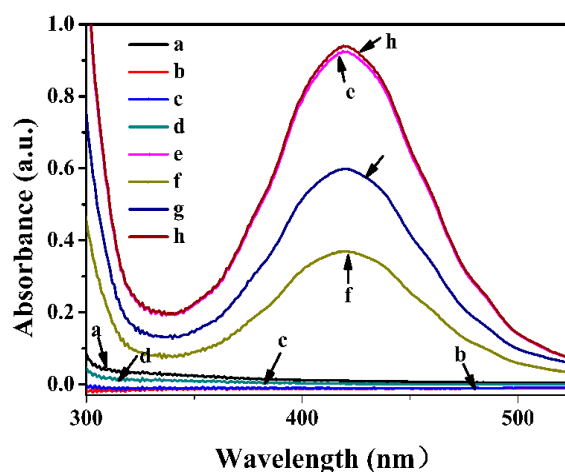

**Figure. S6** Uv-vis absorption spectra of various substances (a) OPD, (b) ALP, (c) AAP, (d) ALP+AAP, (e)  $\text{MnO}_2$ , (f)  $\text{MnO}_2$ +OPD+AAP+ALP, (g)  $\text{MnO}_2$ +OPD+AAP+ALP+2,4-D, (h)  $\text{MnO}_2$ +OPD+2,4-D

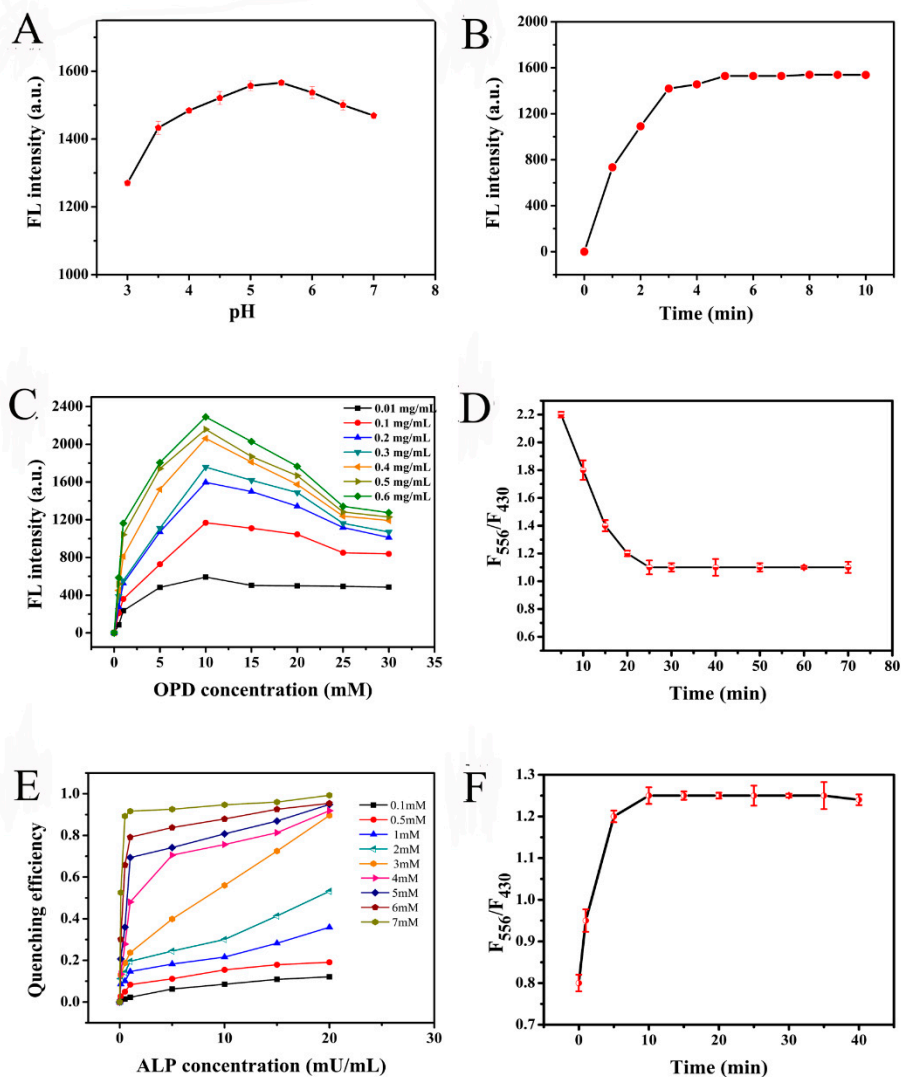

**Figure.S7** Effects of (A) OPD-oxidation-related pH, (B) oxidation time, (C) concentrations of OPD and the MnO<sub>2</sub> nanosheets, (D) ALP hydrolysis time, (E) concentration of the hydrolyzed AAP substrate, and (F) time required for enzyme inhibition by 2,4-D

**Table S1** Comparison of the 2,4-D sensor reported herein with similar previously reported sensors

| Method           | Linear range | Detection limit | Type                          | Reference                      |
|------------------|--------------|-----------------|-------------------------------|--------------------------------|
| Electrochemistry | 100–1000 nM  | 34 nM           | Boron-doped diamond electrode | (Neto ,Oliveira,& Suarez,2022) |

|                          |                          |                         |                                                    |                          |
|--------------------------|--------------------------|-------------------------|----------------------------------------------------|--------------------------|
| Fluorescence             | 0–5 $\mu\text{g L}^{-1}$ | 50 $\text{ng mL}^{-1}$  | Gold nanobipyramids sensors                        | (Ye, Zhang,& Wang, 2022) |
| Electrochemistry         | 0.1–1 $\text{mg L}^{-1}$ | 50 $\mu\text{g L}^{-1}$ | Prussian blue nanoparticles                        | (Arduini, Moscone, 2019) |
| Electrochemistry         | 1.4–2.7 $\mu\text{M}$    | 0.21 $\mu\text{M}$      | $\text{Fe}_3\text{O}_4$ -polyaniline nanocomposite | (Goswami ,Mahanta, 2021) |
| Ratiometric fluorescence | 0.05–30 $\mu\text{g/mL}$ | 0.013 $\mu\text{g/mL}$  | $\text{MnO}_2$ -NCDs-OPD                           | Present study            |

## References

Neto J C D, Dos Santos V B, de Oliveira S C B, Suarez W T, de Oliveira J L (2022) In situ voltammetric analysis of 2, 4-dichlorophenoxyacetic acid in environmental water using a boron doped diamond electrode and an adapted unmanned air vehicle sampling platform. *Anal. Methods* 14(13):1311-1319

Ye X, F, Yang L, Yang W, Zhang L, Wang Z (2022) Paper-based multicolor sensor for on-site quantitative detection of 2,4-dichlorophenoxyacetic acid based on alkaline phosphatase-mediated gold nanobipyramids growth and colorimeter-assisted method for quantifying color. *Talanta* 245:123489

Arduini F, Cinti S, Caratelli V, Amendola L, Palleschi G, Moscone D (2019) Origami multiple paper-based electrochemical biosensors for pesticide detection. *Biosens. Bioelectron.* 126:346-354

Goswami B, Mahanta D (2021)  $\text{Fe}_3\text{O}_4$ -Polyaniline Nanocomposite for Non-enzymatic Electrochemical Detection of 2,4-Dichlorophenoxyacetic Acid. *ACS Omega* 6(27):17239-17246
